# Supplementary material
Source: publisher figshare collection journal article supplement (https://acs.figshare.com/ndownloader/files/3793105)
Supplement: Supplementary file 1 [file 3793105]

## Supporting Information

### CO<sub>2</sub> capture from a binary CO<sub>2</sub>/N<sub>2</sub> and a ternary CO<sub>2</sub>/N<sub>2</sub>/H<sub>2</sub> mixture by PSA: experiments and predictions

Dorian Marx, Lisa Joss, Max Hefti, Matteo Gazzani, Marco Mazzotti

*ETH Zurich, Institute of Process Engineering, Sonneggstrasse 3, CH-8092 Zurich, Switzerland*

Email: marco.mazzotti@ipe.mavt.ethz.ch

#### 1 Experimental and simulation results from binary PSA experiments

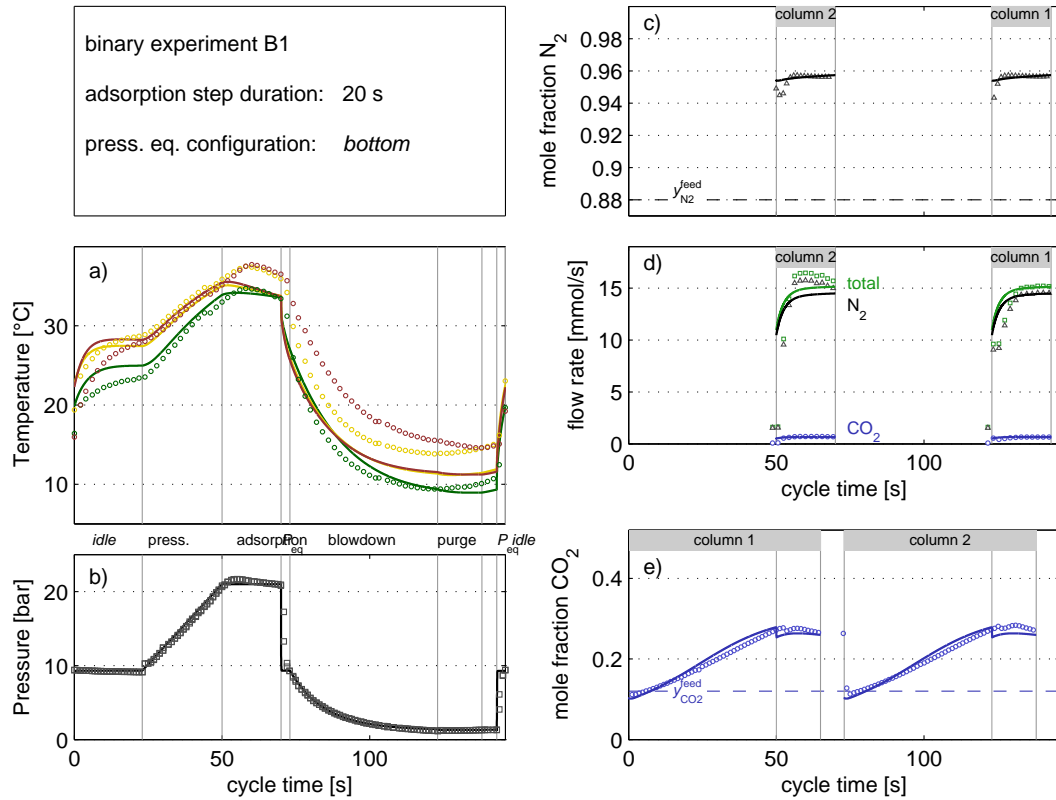

Figure S1: Experimental and simulation data for one full cycle of experiment B1.

- a) Temperature at three location in column 2: 10 cm (green), 60 cm (yellow), and 110 cm (red) from the bottom.
- b) Pressure measured at the bottom of column 2.
- c) Composition of the light product as measured by the MS.
- d) Flow rate of the light product, along with component-specific flow rates.
- e) Composition of the heavy product.

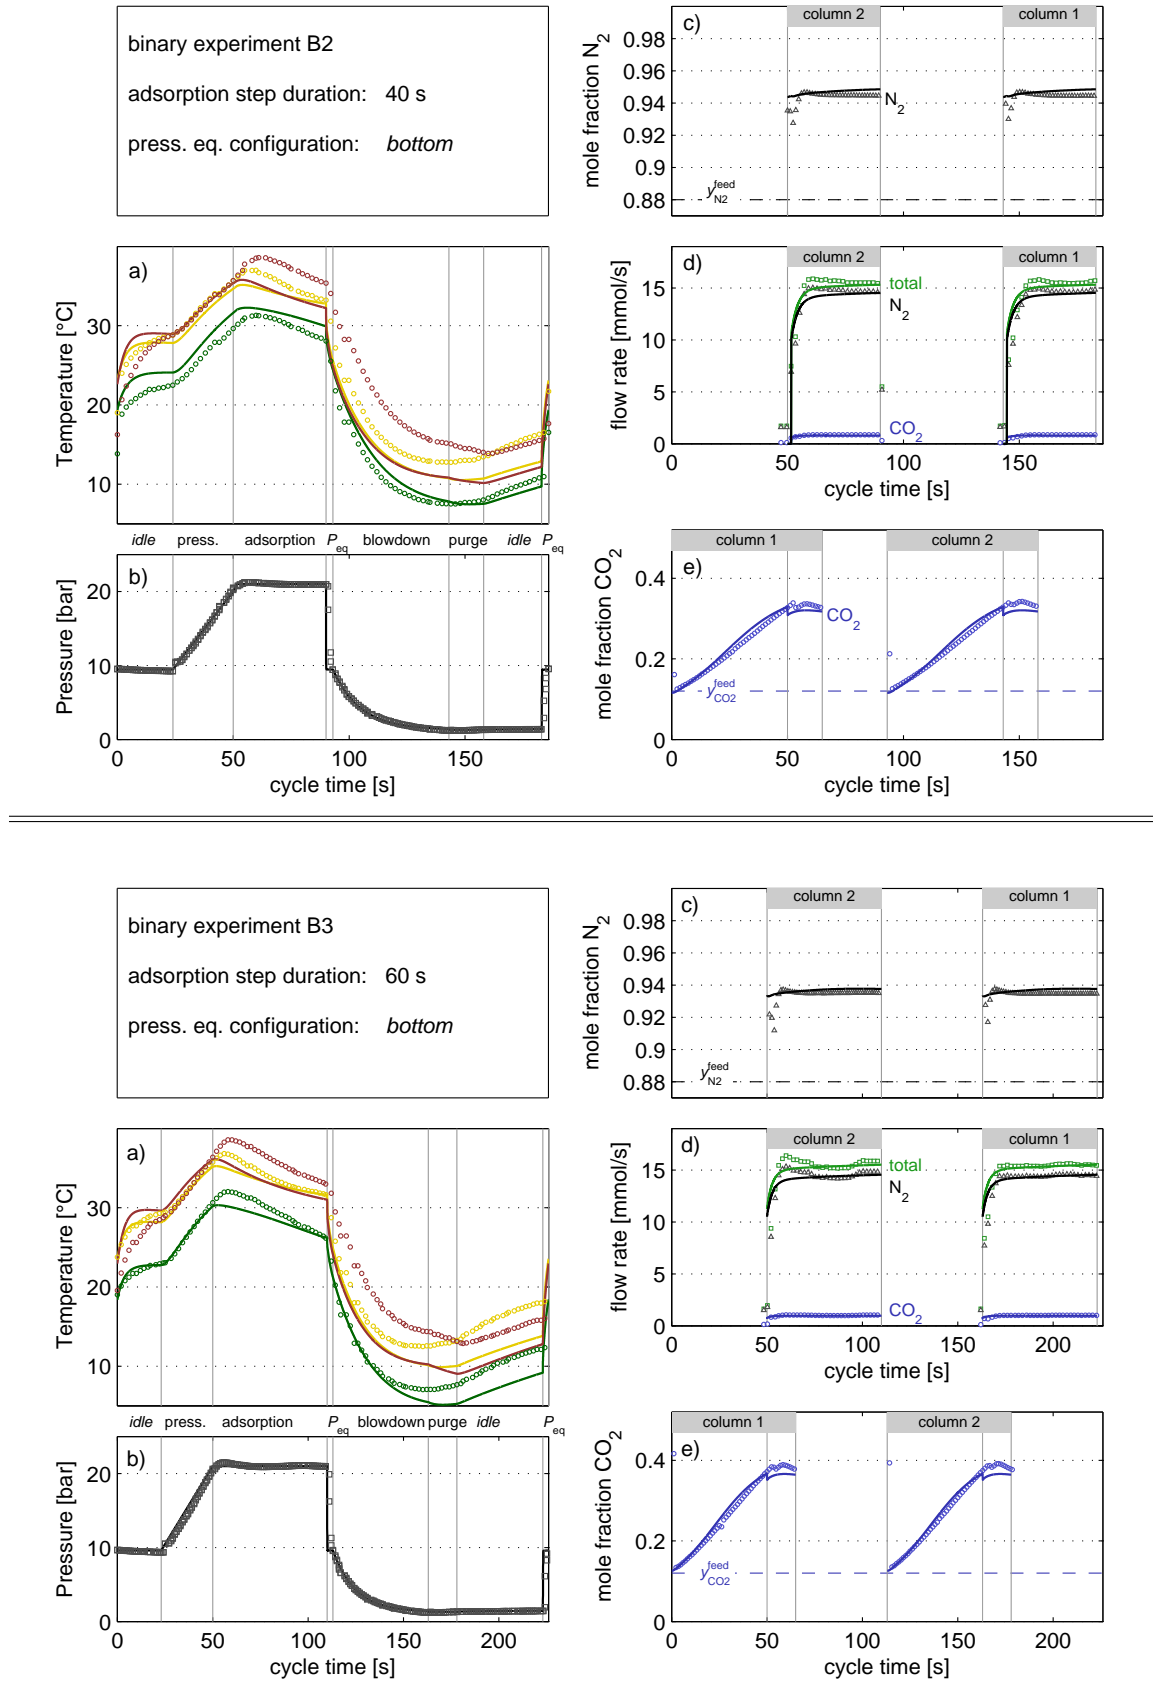

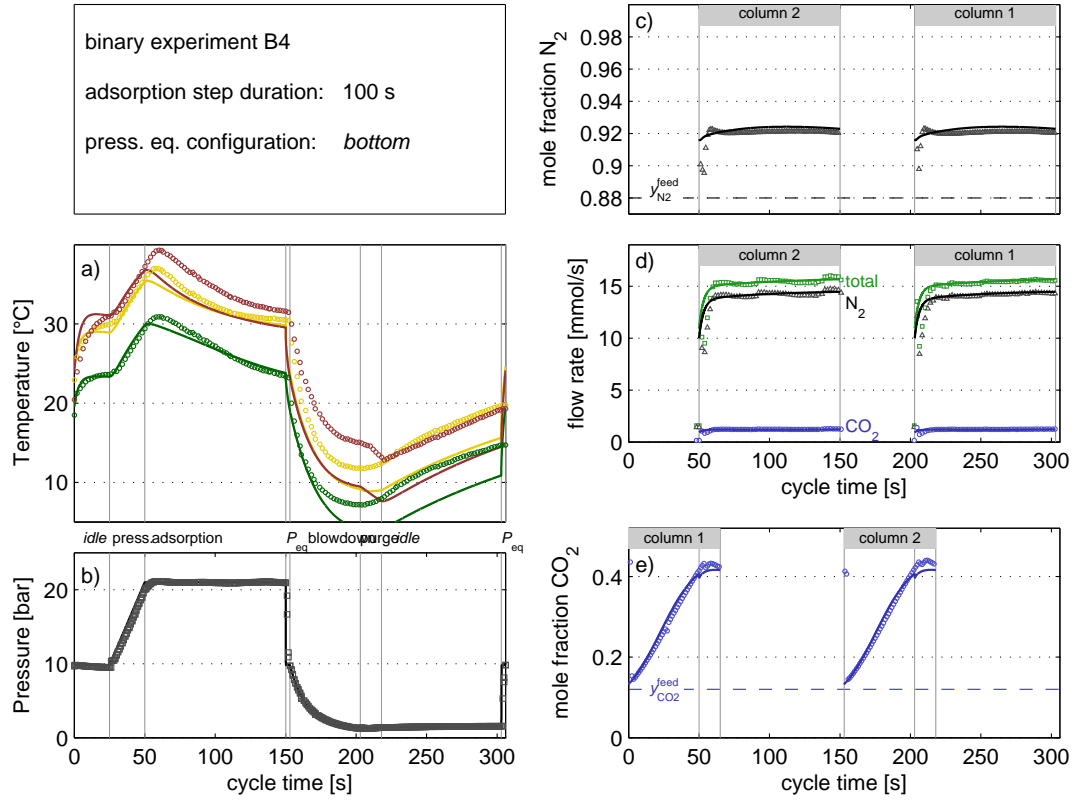

Figure S3: Experimental and simulation data for one full cycle of experiment B4.

- a) Temperature at three location in column 2: 10 cm (green), 60 cm (yellow), and 110 cm (red) from the bottom.
- b) Pressure measured at the bottom of column 2.
- c) Composition of the light product as measured by the MS.
- d) Flow rate of the light product, along with component-specific flow rates.
- e) Composition of the heavy product.

## 2 Experimental and simulation results from ternary PSA experiments

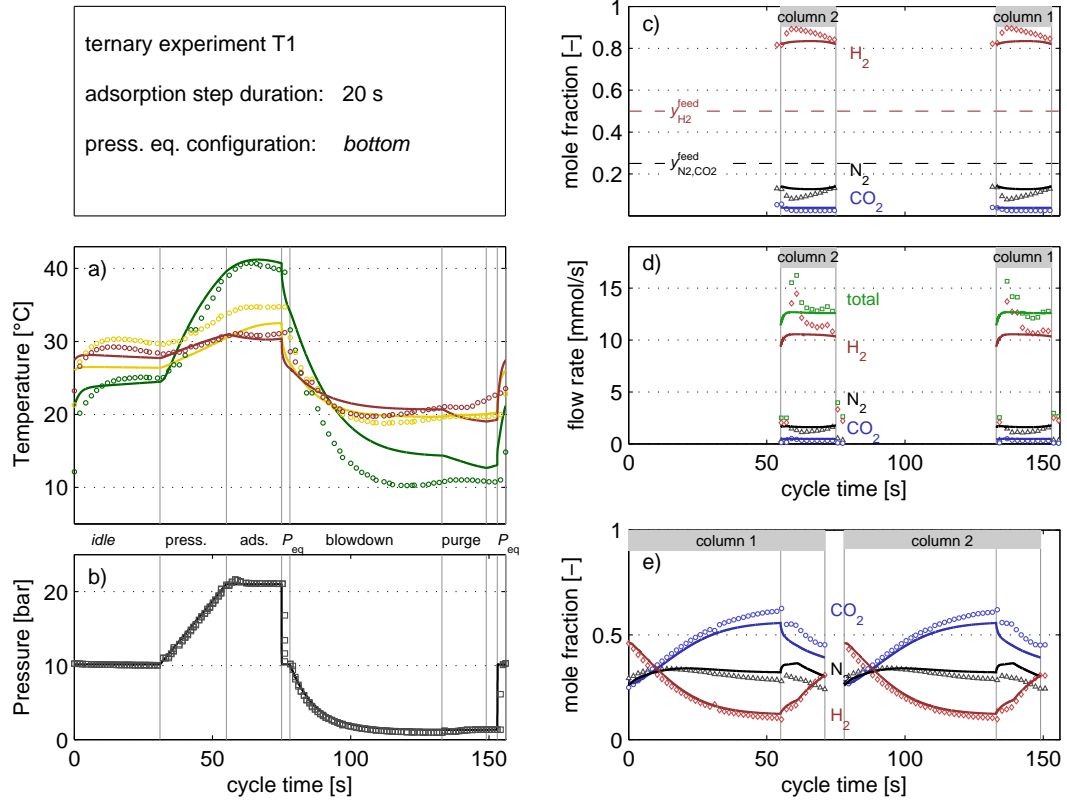

Figure S4: Experimental and simulation data for one full cycle of experiment T1.

- a) Temperature at three location in column 2: 10 cm (green), 60 cm (yellow), and 110 cm (red) from the bottom.
- b) Pressure measured at the bottom of column 2.
- c) Composition of the light product as measured by the MS.
- d) Flow rate of the light product, along with component-specific flow rates.
- e) Composition of the heavy product.

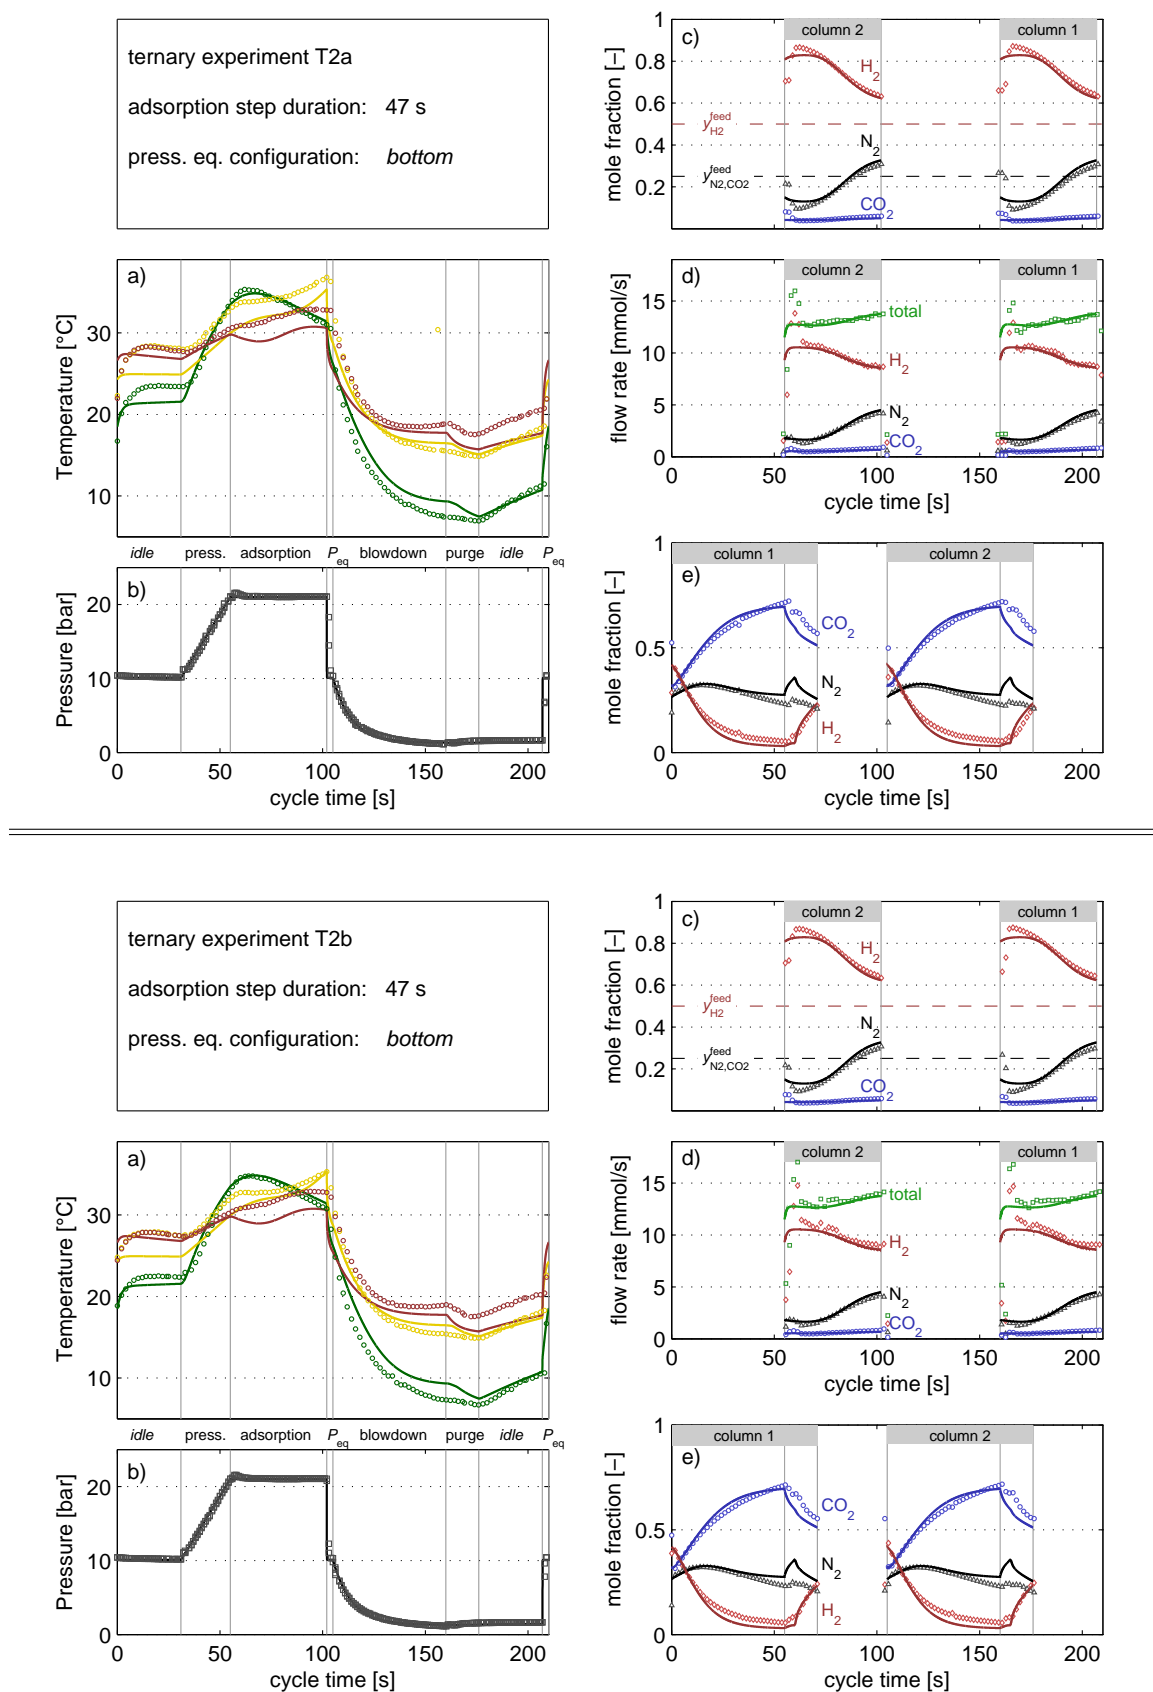

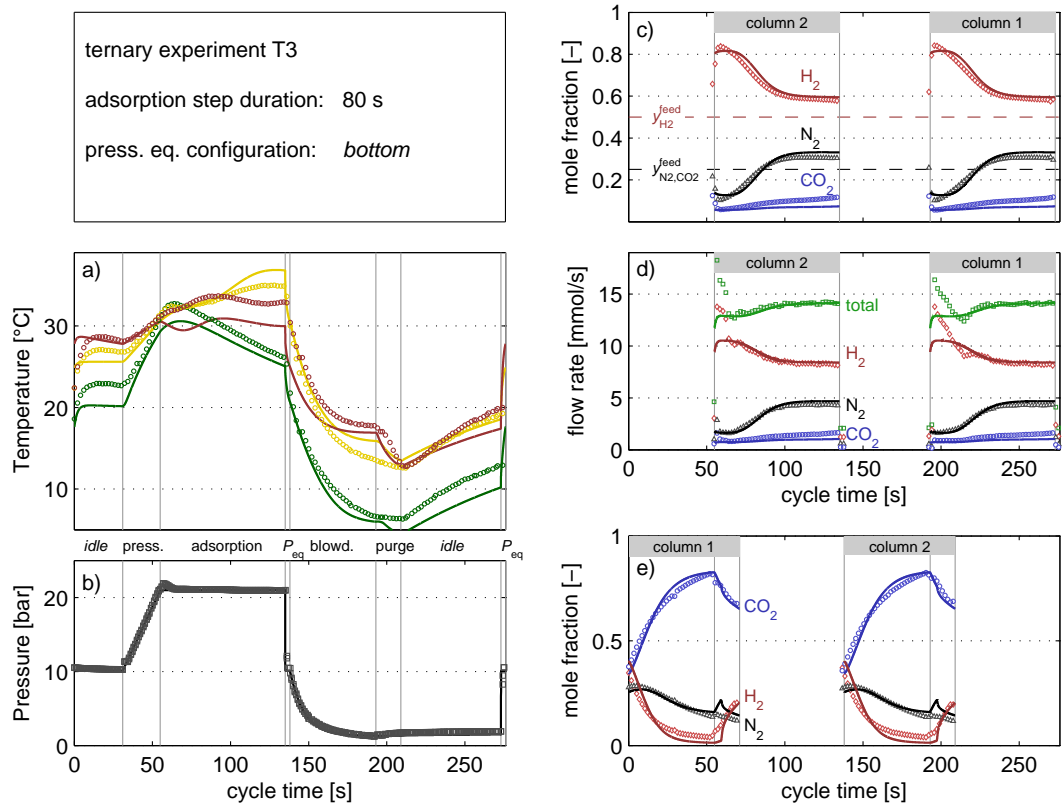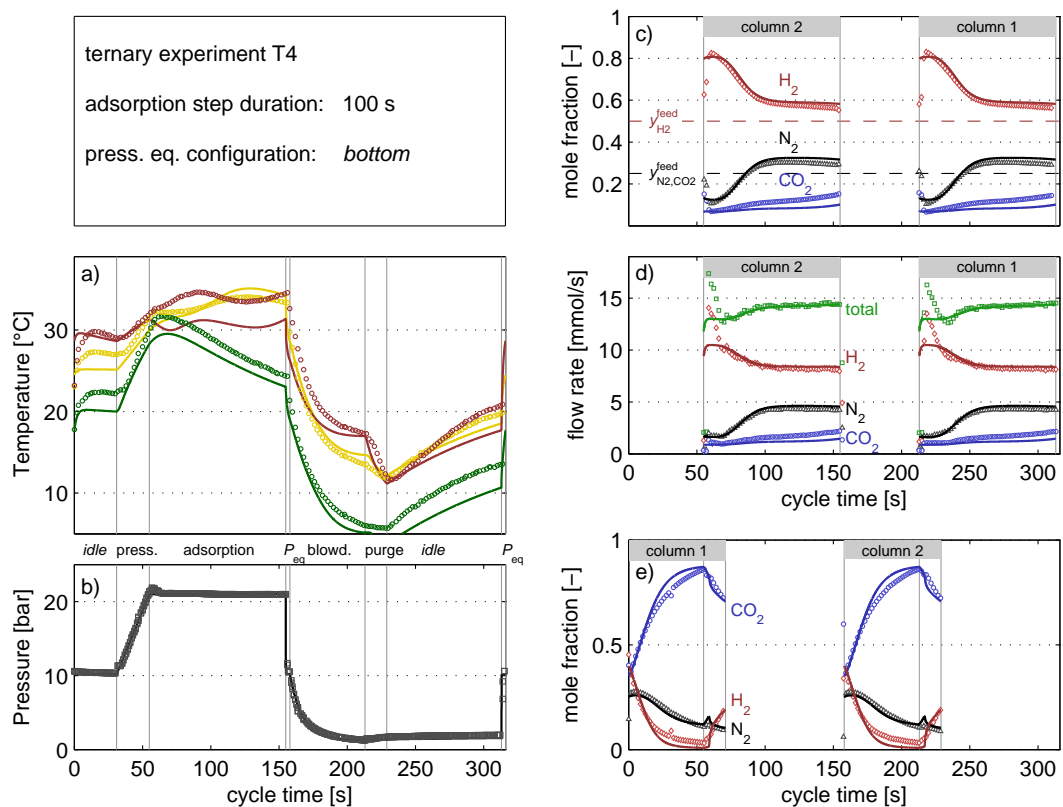

Figure S6: Experimental and simulation data for one full cycle of experiments T3 (top) and T4 (bottom), the two experiments with the longest adsorption step time.

- Temperature at three location in column 2: 10 cm (green), 60 cm (yellow), and 110 cm (red) from the bottom.
- Pressure measured at the bottom of column 2.
- Composition of the light product as measured by the MS.
- Flow rate of the light product, along with component-specific flow rates.
- Composition of the heavy product.

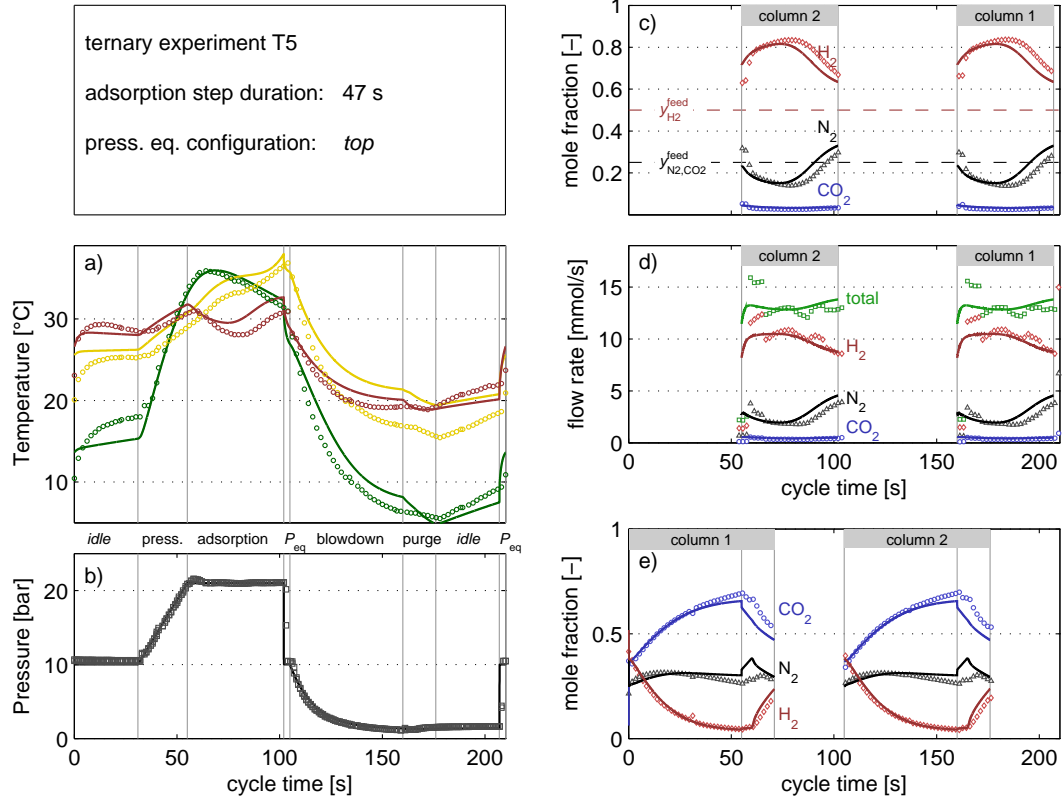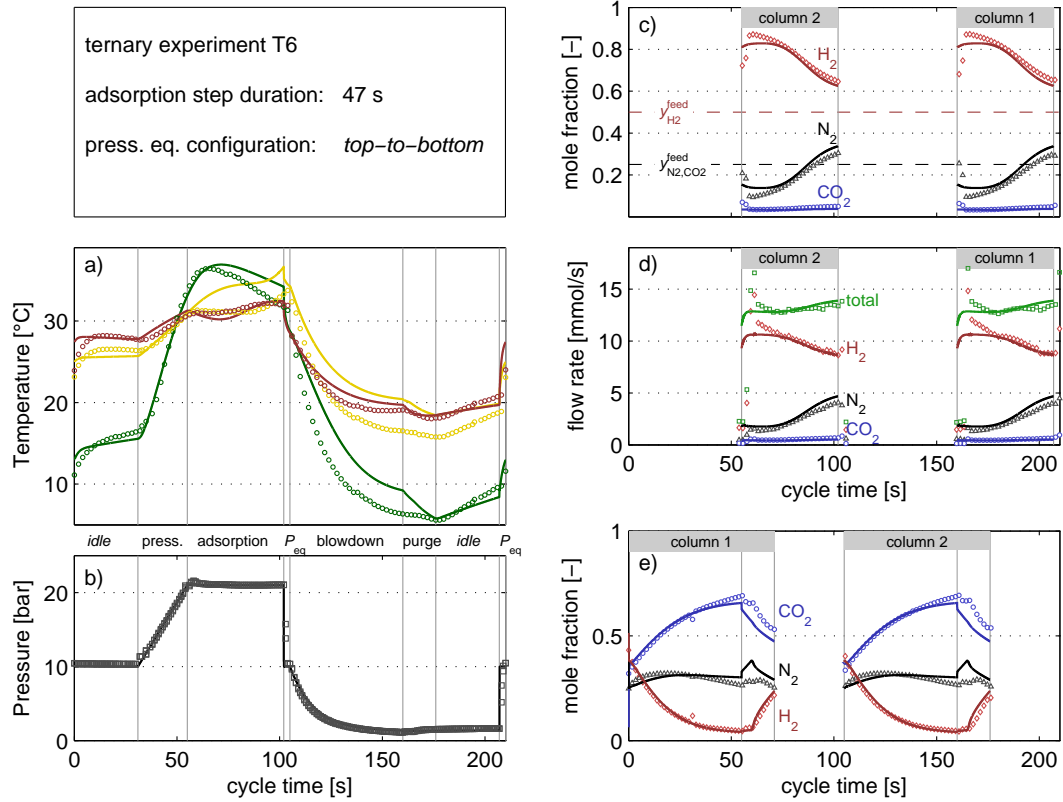

Figure S7: Experimental and simulation data for one full cycle of experiments T5 (top) and T6 (bottom), the two experiments with the alternative configurations during the pressure equalization step.

- a) Temperature at three location in column 2: 10 cm (green), 60 cm (yellow), and 110 cm (red) from the bottom.
- b) Pressure measured at the bottom of column 2.
- c) Composition of the light product as measured by the MS.
- d) Flow rate of the light product, along with component-specific flow rates.
- e) Composition of the heavy product.
